# Supplementary material for: Staphylococcal Bap Proteins Build Amyloid Scaffold Biofilm Matrices in Response to Environmental Signals
Source: PubMed Central journal article supplement (PMC4915627; doi:10.1371/journal.ppat.1005711), 2016-06-21
Supplement: ppat.1005711.s018.pdf [file ppat.1005711.s018.pdf]

**S3 Table** . Summary of the proteins identified by proteomics from aggregates of *S. aureus* V329 in LB-glu and LB.

| Putative Protein                                        | NCBI GI n° | LB-glu      |            |                 | LB          |            |                 |
|---------------------------------------------------------|------------|-------------|------------|-----------------|-------------|------------|-----------------|
|                                                         |            | Total score | % coverage | Peptides (>95%) | Total score | % coverage | Peptides (>95%) |
| Biofilm-associated protein                              | 31616158   | 89,13       | 53,3       | 53              | --          | --         | --              |
| Bifunctional autolysin precursor                        | 151221134  | 50,48       | 53,6       | 26              | 41,98       | 62         | 20              |
| Hypothetical protein                                    | 151220813  | 33,77       | 70,2       | 28              | 45,82       | 78,3       | 33              |
| branched-chain alpha-keto acid dehydrogenase subunit E2 | 151221173  | 31,49       | 64,7       | 18              | 24,37       | 54,9       | 14              |
| Dihydrolipoamide dehydrogenase                          | 151221174  | 29,13       | 68,6       | 22              | 22,48       | 68,2       | 13              |
| ABC transporter, amino acid binding protein             | 151222525  | 26,25       | 75,7       | 15              | 11,96       | 69,1       | 8               |
| 50s ribosomal protein L2                                | 151222361  | 21,97       | 69,7       | 12              | 12,9        | 37,6       | 1               |
| Penicillin binding protein 2                            | 151221573  | 20,29       | 44,3       | 12              | 24,7        | 68,8       | 13              |
| Pyruvate kinase                                         | 151221804  | 18,53       | 58,5       | 11              | --          | --         | --              |
| Molybdate binding protein                               | 151222391  | 18,31       | 65,8       | 9               | 10,89       | 74,2       | 8               |
| Elongation factor Tu                                    | 151220722  | 17,33       | 64,7       | 9               | 8,82        | 61,9       | 6               |
| peptidyl-propyl cis/trans-isomerase                     | 151221945  | 15,72       | 66,6       | 9               | 14,85       | 74,4       | 9               |
| ABC transporter substrate-binding protein               | 151220994  | 15,2        | 67,4       | 7               | 22,25       | 70,7       | 14              |
| Pyruvate dehydrogenase E1                               | 151221172  | 13,41       | 46,8       | 7               | 12,17       | 71,1       | 7               |
| Hypothetical protein                                    | 151220899  | 12,99       | 52,9       | 7               | 5,95        | 93,9       | 3               |
| malate:quinone oxidoreductase                           | 151222716  | 12,38       | 37,4       | 8               | 2,46        | 34,4       | 1               |
| Glyceraldehyde-3-phosphate dehydrogenase                | 151220953  | 12,15       | 67         | 7               | 2,1         | 56,9       | 1               |
| Signal peptidase IB                                     | 151221048  | 12,01       | 67,5       | 7               | 10,74       | 63,4       | 5               |
| Immunoglobulin-binding protein (Sbi)                    | 151222529  | 10,96       | 69         | 4               | 9,88        | 57,1       | 5               |
| 50s ribosomal protein L15                               | 151222345  | 10,38       | 82,2       | 5               | --          | --         | --              |
| phosphopyruvate hydratase                               | 151220957  | 10,09       | 48,6       | 5               | --          | --         | --              |
| 50s ribosomal protein L21                               | 151221761  | 9,59        | 96,1       | 6               | 3,72        | 68,6       | 2               |
| N-acetylmuramoyl-L-alanine amidase                      | 151222755  | 8,76        | 54,9       | 4               | --          | --         | --              |
| Hypothetical protein                                    | 151221023  | 8,5         | 32,8       | 4               | --          | --         | --              |
| Bifunctional preprotein translocase subunit SecD/SecF   | 151221751  | 8           | 30,6       | 4               | 1,96        | 30,2       | 1               |
| Universal stress protein                                | 151221816  | 7,95        | 62,1       | 4               | 7,44        | 76,5       | 5               |
| Hypothetical protein                                    | 151220965  | 7,43        | 59,5       | 4               | 5,73        | 50         | 3               |
| Secretory antigen precursor SsaA                        | 151222411  | 7,01        | 34,8       | 7               | 0,37        | 3,7        | 1               |
| Hypothetical protein                                    | 151220889  | 6,47        | 52,7       | 4               | --          | --         | --              |
| 30s ribosomal protein S13                               | 151222340  | 6,17        | 53,7       | 3               | 1,96        | 79,3       | 1               |
| 30s ribosomal protein S9                                | 151222331  | 6,1         | 59,2       | 4               | --          | --         | --              |
| L-lactate dehydrogenase                                 | 151220388  | 5,64        | 20,2       | 3               | --          | --         | --              |
| elongation factor G                                     | 151220721  | 5,57        | 25,5       | 4               | --          | --         | --              |
| 30S ribosomal protein S4                                | 151221825  | 5,5         | 41         | 3               | 2,61        | 39,5       | 2               |
| 30S ribosomal protein S2                                | 151221378  | 5,48        | 33,3       | 3               | 2           | 60,4       | 2               |
| 50S ribosomal protein L17                               | 151222337  | 5,43        | 63,9       | 3               | --          | --         | --              |
| 50S ribosomal protein L20                               | 151221784  | 5,35        | 83,1       | 4               | 2,99        | 83,1       | 2               |
| Hypothetical protein                                    | 151221170  | 5,08        | 52,4       | 2               | 2           | 50,5       | 2               |
| 50S ribosomal protein L19                               | 151221363  | 5,06        | 76,7       | 3               | 1,09        | 50         | 1               |
| Cell envelope-related transcriptional attenuator        | 151222423  | 4,53        | 26,7       | 3               | 2,12        | 37,8       | 2               |
| Hypothetical protein                                    | 151221647  | 4,5         | 54,4       | 3               | 2,29        | 53,9       | 2               |
| Immunodominant antigen B                                | 151222749  | 4,41        | 57,7       | 3               | 11,24       | 66,9       | 8               |
| pyruvate dehydrogenase E1 component, alpha subunit      | 151221171  | 4,38        | 49,2       | 2               | 4,69        | 49,2       | 2               |
| acetolactate synthase                                   | 151222323  | 4,31        | 31,4       | 3               | --          | --         | --              |
| ABC transporter iron compound-binding protein           | 151222143  | 4,24        | 55,8       | 2               | 4,05        | 58,1       | 2               |
| 30S ribosomal protein S7                                | 151220720  | 4,24        | 41,7       | 2               | 2,21        | 78,2       | 2               |
| Hypothetical protein                                    | 151222466  | 4,21        | 36,7       | 2               | 2,92        | 40,5       | 2               |
| mannosyl-glycoprotein endo-beta-N-acetylglucosamidase   | 151221879  | 4,18        | 33,1       | 2               | 1,64        | 53,9       | 1               |
| Immunodominant antigen A                                | 151222681  | 4,02        | 32,6       | 3               | 2,05        | 21,5       | 1               |
| 30S ribosomal protein S10                               | 151222365  | 4           | 72,6       | 2               | 2,04        | 51         | 1               |
| ferrichrome ABC transporter lipoprotein                 | 151222290  | 4           | 24,2       | 2               | 8,63        | 55,7       | 4               |
| 50S ribosomal protein L16                               | 151222357  | 4           | 46,5       | 2               | 2,44        | 58,3       | 2               |
| Hypothetical protein                                    | 151220576  | 3,96        | 31,1       | 2               | 7,97        | 78,4       | 5               |
| 30S ribosomal protein S8                                | 151222350  | 3,84        | 60,6       | 3               | 1,37        | 64,4       | 1               |
| 50S ribosomal protein L5                                | 151222352  | 3,76        | 52         | 3               | --          | --         | --              |
| 50S ribosomal protein L4                                | 151222363  | 3,72        | 36,2       | 3               | --          | --         | --              |
| quinol oxidase polypeptide II QoxA                      | 151221142  | 3,45        | 49,7       | 3               | 16,6        | 62         | 9               |
| 50S ribosomal protein L29                               | 151222356  | 3,34        | 43,8       | 2               | --          | --         | --              |
| 50S ribosomal protein L14                               | 151222354  | 3,28        | 32,8       | 2               | --          | --         | --              |
| alcohol dehydrogenase                                   | 151220789  | 3           | 17         | 2               | --          | --         | --              |

Common proteins identified in both LB and LB-glu conditions are highlighted in yellow.
