# Supplementary material for: Staphylococcal Bap Proteins Build Amyloid Scaffold Biofilm Matrices in Response to Environmental Signals
Source: PubMed Central journal article supplement (PMC4915627; doi:10.1371/journal.ppat.1005711), 2016-06-21
Supplement: ppat.1005711.s020.pdf [file ppat.1005711.s020.pdf]

**S5 Table** . Sequence comparison of the B region of Bap between different staphylococcal species.

|                         | Protein identity (%) | Protein similarity (%) | Theoretical pI <sup>a</sup> | EF-hand motifs <sup>b</sup>              |                                                                   |                                  |
|-------------------------|----------------------|------------------------|-----------------------------|------------------------------------------|-------------------------------------------------------------------|----------------------------------|
|                         |                      |                        |                             | aa                                       | sequence                                                          | similarity                       |
| <i>S. aureus</i>        | 100                  | –                      | 4.61                        | 729-741<br>752-764                       | DYDKDGLLDRYEr<br>DTDGDGKnDGDEV                                    | 89 %<br>91 %                     |
| <i>S. epidermidis</i>   | 97                   | 99                     | 4.56                        | 729-741<br>752-764                       | DYDKDGLLDRYEr<br>DTDGDGKnDGDEV                                    | 91 %<br>98 %                     |
| <i>S. simulans</i>      | 95                   | 98                     | 4.65                        | 729-741<br>752-764                       | DYDKDGLLDRYEr<br>DTDGDGKnDGDEI                                    | 91 %<br>89 %                     |
| <i>S. xylosus</i>       | 80                   | 91                     | 4.52                        | 725-737<br>748-760                       | DYDKDGLLDRYEr<br>DTDGDGKnDGDEV                                    | 91 %<br>89 %                     |
| <i>S. simiae</i>        | 68                   | 80                     | 4.43                        | 612-624<br>651-663<br>743-755<br>766-778 | DKDlIpFIESVEL<br>DANGNGTITASDL<br>DYDQDGLLDSEYEr<br>DTDGDGKnDGDEV | 80 %<br>Identity<br>91 %<br>89 % |
| <i>S. saprophyticus</i> | 58                   | 74                     | 4.74                        | 557-569<br>580-592                       | DLDKDGLtDNFEF<br>DTDGDGKnDGDEV                                    | 89 %<br>89 %                     |

<sup>a</sup>Theoretical pI corresponds to the estimated isoelectric point calculated using Compute pI/Mw tool of ExPaSy server.

<sup>b</sup>EF- hand motifs corresponds to the predicted EF-hand-like calcium binding domains calculated using PROSCAN (PROSITE database). Residues that do not conform the EF- hand loop consensus sequence are in lowercase letters.
